# Supplementary material for: A tunable submicro-optofluidic polymer filter based on guided-mode resonance
Source: Royal Society of Chemistry journal article supplement (doi:10.1039/c4nr07233b), 2015-01-01

## Supplementary information

### A tunable submicro-optofluidic polymer filter based on guided-mode resonance

Guohui Xiao<sup>a</sup>, Qiangzhong Zhu<sup>a</sup>, Yang Shen<sup>a</sup>, Kezheng Li<sup>a</sup>, Mingkai Liu<sup>b</sup>, Qiandong Zhuang<sup>c</sup> and Chongjun Jin<sup>\*a</sup>

**Fig. S1** (a) SEM image of a cross-section of the grating with a 368 nm period. (b) Magnified image of (a). The cross-section of the PVK is quite rough, it is caused by the aggregation of the gold particles during the evaporation of the conductive layer of gold (red dash square). The cross-section of the PVK for red solid square is the real characteristic of the PVK film.

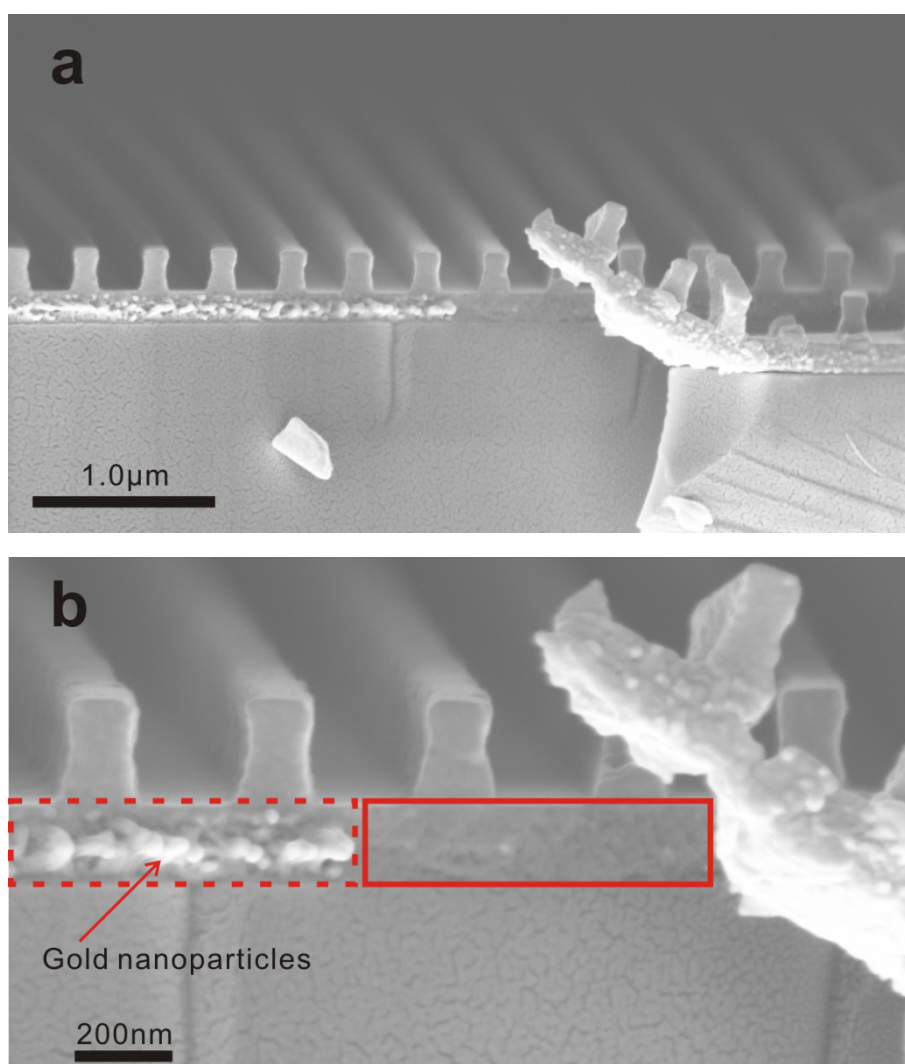

Supplement: c4nr07233b1.pdf [file c4nr07233b1.pdf]
